# Supplementary material for: Cognitive Impairment in Convalescent COVID-19 Patients Undergoing Multidisciplinary Rehabilitation: The Association with the Clinical and Functional Status
Source: MDPI journal article supplement (doi:10.3390/healthcare10030480), 2022-03-04
Supplement: s1 [file s1]

## Supplementary online material

# Cognitive Impairment in Convalescent COVID-19 Patients Undergoing Multidisciplinary Rehabilitation: The Association with the Clinical and Functional Status

Pasquale Moretta <sup>1,\*‡</sup>, Pasquale Ambrosino <sup>2,\*‡</sup>, Anna Lanzillo <sup>1</sup>, Laura Marcuccio <sup>1</sup>, Salvatore Fuschillo <sup>3</sup>, Antimo Papa <sup>2</sup>, Gabriella Santangelo <sup>4</sup>, Luigi Trojano <sup>4‡</sup> and Mauro Maniscalco <sup>3‡</sup>

- <sup>1</sup> Istituti Clinici Scientifici Maugeri IRCCS, Neurological Rehabilitation Unit of Telese Terme Institute, 82037 Telese Terme, Italy; anna.lanzillo@icsmaugeri.it (A.L.); laura.marcuccio@icsmaugeri.it (L.M.)
- <sup>2</sup> Istituti Clinici Scientifici Maugeri IRCCS, Cardiac Rehabilitation Unit of Telese Terme Institute, 82037 Telese Terme, Italy; antimo.papa@icsmaugeri.it
- <sup>3</sup> Istituti Clinici Scientifici Maugeri IRCCS, Pulmonary Rehabilitation Unit of Telese Terme Institute, 82037 Telese Terme, Italy; salvatore.fuschillo@icsmaugeri.it (S.F.); mauro.maniscalco@icsmaugeri.it (M.M.)
- <sup>4</sup> Department of Psychology, Università della Campania Luigi Vanvitelli, 81100 Caserta, Italy; gabriella.santangelo@unicampania.it (G.S.); luigi.trojano@unicampania.it (L.T.)
- \* Correspondence: pasquale.moretta@icsmaugeri.it (P.M.); pasquale.ambrosino@icsmaugeri.it (P.A.)
- † The two Authors equally contributed to the manuscript.
- ‡ The two Authors share co-seniorship.

## Table of contents

|                        |                                                                                                                                                                                                                                                                         |
|------------------------|-------------------------------------------------------------------------------------------------------------------------------------------------------------------------------------------------------------------------------------------------------------------------|
| Supplemental Table S3  | <ul style="list-style-type: none"><li>- Clinical and demographical characteristics of the sample as a function of sex.</li><li>- Raw scores of neuropsychological tests.</li><li>- Correlations between measure of clinical, functional and cognitive status.</li></ul> |
| Supplemental Figure S1 | Flow chart of study participants.                                                                                                                                                                                                                                       |

**Supplemental Figure S1.** Flow chart of study participants.

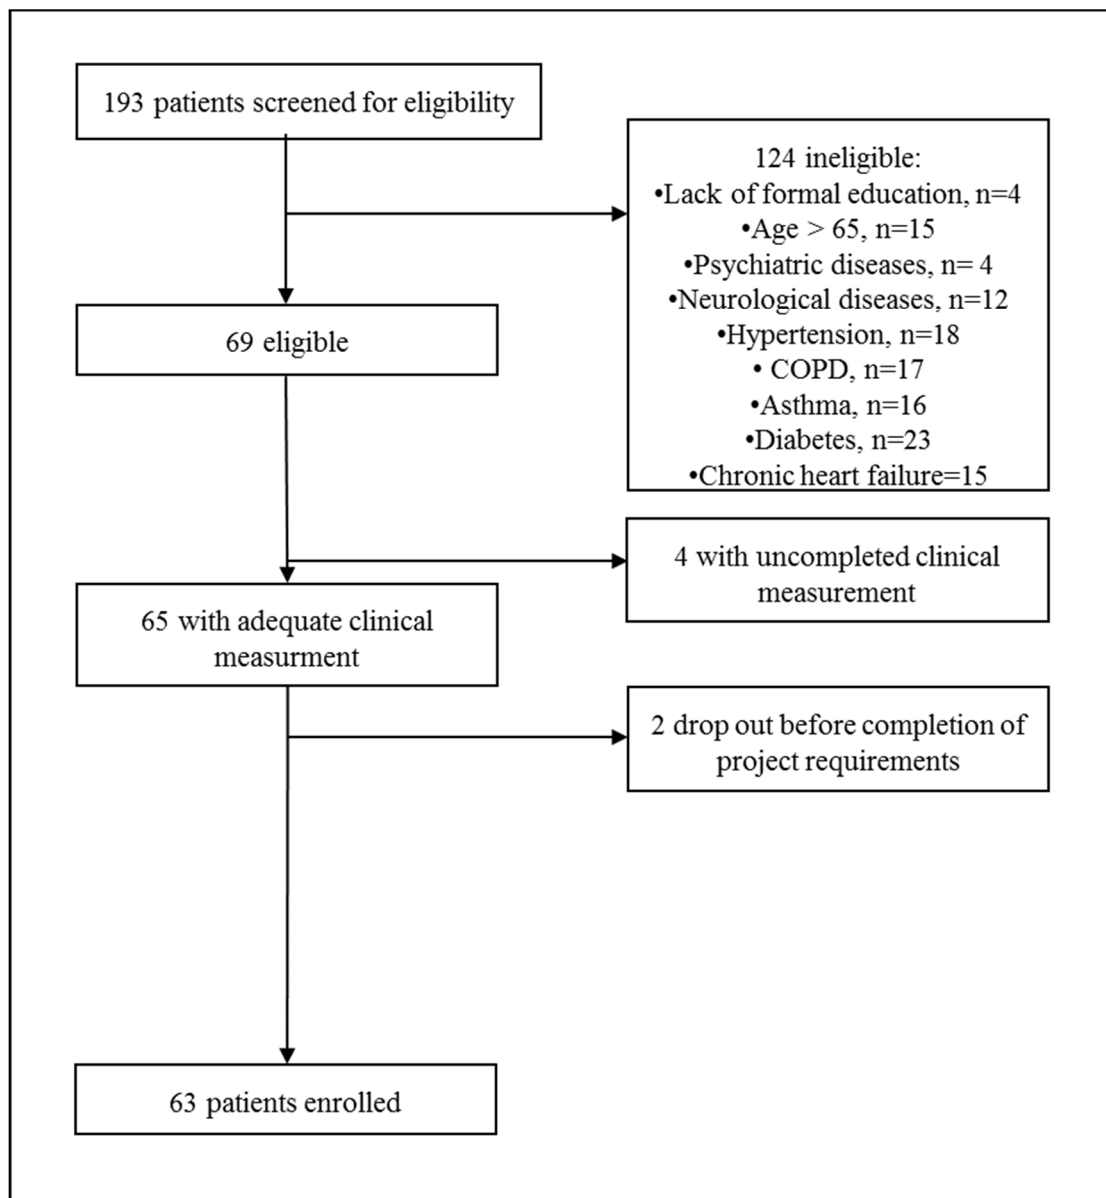

**Supplemental Table S1.** Clinical and demographical characteristics of the sample as a function of sex.

| <b>Demographical and Clinical measures/groups</b> | <b>Females (n= 16)<br/>mean (S.D.)</b> | <b>Males (n= 47)<br/>mean (S.D.)</b> | <b>z</b> | <b>p</b> |
|---------------------------------------------------|----------------------------------------|--------------------------------------|----------|----------|
| <b>Age</b>                                        | 61.56 (10.191)                         | 59.32 (11.311)                       | .787     | .431     |
| <b>Education (years)</b>                          | 10.19 (3.710)                          | 12.48 (3.427)                        | 2.188    | .029     |
| <b>Disease duration (days)</b>                    | 54.20 (35.86)                          | 48.24 (25.86)                        | .642     | .521     |
| <b>Duration of hospital stay (days)</b>           | 30.88 (19.565)                         | 23.68 (15.340)                       | 1.225    | .220     |
| <b>Duration of bed stay (days)</b>                | 24.56 (25.076)                         | 22.11 (15.731)                       | .247     | .805     |
| <b>D-Dimer (ng/ml)</b>                            | 626.00 (391.368)                       | 597.77 (587.138)                     | 1.154    | .248     |
| <b>CRP (mg/l)</b>                                 | 6.586 (8.999)                          | 10.161 (19.275)                      | .361     | -.718    |
| <b>PaO2 (mmHg)</b>                                | 81.785 (14.515)                        | 73.625 (14.822)                      | 1.798    | .072     |
| <b>PaCO2 (mmHg)</b>                               | 40.900 (13.893)                        | 36.359 (6.537)                       | 1.656    | .098     |
| <b>FEV1 (% predicted)</b>                         | 77.62 (22.747)                         | 79.21 (20.611)                       | .305     | .760     |
| <b>FVC (% predicted)</b>                          | 76.46 (22.393)                         | 76.09 (20.224)                       | .153     | .879     |
| <b>FEV1/FVC</b>                                   | 80.80 (7.59)                           | 82.55 (7.65)                         | .617     | .537     |
| <b>DLCO (% predicted)</b>                         | 44.88 (12.04)                          | 60.74 (21.48)                        | 2.108    | .035     |
| <b>DLCO/VA (% predicted)</b>                      | 73.71 (19.88)                          | 80.29 (22.07)                        | .858     | .391     |
| <b>Mean daytime SBP (mmHg)</b>                    | 120.43 (23.43)                         | 121.28 (12.86)                       | .604     | .546     |
| <b>Mean daytime DBP (mmHg)</b>                    | 77.24 (12.15)                          | 79.64 (8.77)                         | .899     | .369     |
| <b>Mean nighttime SBP (mmHg)</b>                  | 117.65 (20.86)                         | 116.07 (15.17)                       | .155     | .877     |
| <b>Mean nighttime DBP (mmHg)</b>                  | 72.12 (11.02)                          | 73.52 (9.68)                         | .449     | .653     |
| <b>HADS_Anxiety score</b>                         | 10.64 (3.529)                          | 8.96 (3.261)                         | 1.468    | .142     |
| <b>HADS_Depression score</b>                      | 11.45 (3.778)                          | 11.90 (4.304)                        | .215     | .830     |
| <b>STAI - Trait score</b>                         | 41.64 (11.893)                         | 39.55 (8.129)                        | .708     | .479     |
| <b>BARTHEL score</b>                              | 79.00 (23.664)                         | 73.41 (25.942)                       | .817     | .414     |
| <b>EQ-5D Visual Analog Scale</b>                  | 3.172 (10.258)                         | 18.754 (32.287)                      | .585     | .559     |

Abbreviations: CRP: C-reactive protein; PaO2: partial pressure of oxygen in arterial blood; PaCO2: partial pressure of carbon dioxide; FEV1: forced expiratory volume in 1 second; FVC: forced vital capacity; DLCO: diffusion lung capacity for carbon monoxide; VA: alveolar volume; SBP: systolic blood pressure; DBP: diastolic blood pressure; HADS: Hospital Anxiety and Depression Scale; STAI: State trait Anxiety Questionnaire (trait anxiety); EQ-5D: Euro QoL.

**Supplemental Table S2.** Raw scores of neuropsychological tests.

| Neuropsychological tests        | Total Sample (N= 63) | RCE (n= 28)    | NCE (n= 35)   | P           |
|---------------------------------|----------------------|----------------|---------------|-------------|
|                                 | Mean (S.D.)          | Mean (S.D.)    | Mean (S.D.)   |             |
| Montreal Cognitive Assessment   | 25.24 (2.55)         | 23.43 (3.51)   | 26.78 (2.16)  | .016        |
| Frontal Assessment Battery      | 16.28 (1.09)         | 15.93 (.979)   | 16.56 (1.10)  | .029        |
| Coloured Progressive Matrix     | 28.41 (4.50)         | 27.11 (3.76)   | 29.42 (4.81)  | .046        |
| Verbal Fluency (FAS)            | 29.50 (10.24)        | 25.57 (9.90)   | 32.56 (9.56)  | <b>.004</b> |
| Trail Making Test (B-A)         | 79.79 (50.56)        | 109.71 (48.71) | 58.68 (40.65) | <b>.000</b> |
| RAVLT – immediate recall        | 42.17 (9.31)         | 34.00 (8.87)   | 51.97 (19.32) | <b>.001</b> |
| RAVLT – delayed recall          | 7.67 (3.02)          | 6.33 (3.23)    | 8.67 (2.44)   | <b>.002</b> |
| Corsi’s Test                    | 4.88 (.92)           | 4.32 (.72)     | 5.30 (.84)    | <b>.000</b> |
| Corsi’s supra-span Corsi’s Test | 10.09 (1.23)         | 7.41 (.98)     | 12.78 (1.11)  | <b>.000</b> |

Abbreviations: Corsi’s supra-span: Supra-span learning on Corsi’s Test; RAVLT: Rey’s Auditory Verbal Learning Test. In bold are reported the significant differences according to Bonferroni’s correction (p value= .005; for 9 comparisons).

**Supplemental Table S3. Correlations between measure of clinical, functional and cognitive status.**

|                           | 1       | 2       | 3     | 4      | 5      | 6     | 7       | 8     | 9      | 10     | 11    | 12     | 13    | 14 |
|---------------------------|---------|---------|-------|--------|--------|-------|---------|-------|--------|--------|-------|--------|-------|----|
| 1. Hospital Stay duration | 1       |         |       |        |        |       |         |       |        |        |       |        |       |    |
| 2. Bed rest duration      | .712**  | 1       |       |        |        |       |         |       |        |        |       |        |       |    |
| 3. HADS-A                 | -.106   | -.084   | 1     |        |        |       |         |       |        |        |       |        |       |    |
| 4. HADS-D                 | -.039   | -.031   | .204  | 1      |        |       |         |       |        |        |       |        |       |    |
| 5. NPSCT                  | .047    | .112    | .193  | .252   | 1      |       |         |       |        |        |       |        |       |    |
| 6. EQ-5D                  | -.132   | -.149   | -.130 | .126   | -.263  | 1     |         |       |        |        |       |        |       |    |
| 7. PaO2                   | -.342** | -.457** | .023  | -.166  | -.264* | .223  | 1       |       |        |        |       |        |       |    |
| 8. PaCO2                  | .149    | -.077   | .017  | -.203  | -.048  | .053  | -.583** | 1     |        |        |       |        |       |    |
| 9. FEV1%                  | -.224   | -.312*  | -.086 | -.267  | -.156  | .223  | .578**  | .069  | 1      |        |       |        |       |    |
| 10. FVC%                  | -.337** | -.335** | -.068 | -.287* | -.173  | .193  | .579**  | -.114 | .945** | 1      |       |        |       |    |
| 11. FEV1/FVC%             | -.072   | -.035   | .122  | .078   | .069   | .257  | -.069   | .174  | .074   | -.241  | 1     |        |       |    |
| 12. DLCO%                 | -.161   | -.336*  | .078  | -.050  | -.351* | -.062 | .501**  | .139  | .657** | .661** | -.030 | 1      |       |    |
| 13. DLCO/VA%              | -.199   | -.145   | .258  | .228   | -.188  | .134  | .106    | .126  | .147   | .062   | .380  | .558** | 1     |    |
| 14. ACRBP                 | .062    | .205    | -.039 | .066   | .410** | -.186 | -.180   | -.096 | -.144  | -.069  | -.161 | -.132  | -.069 | 1  |

HADS: Hospital Anxiety (A) and Depression (D) Scale; NPSCT: number of pathological scores on cognitive test; EQ-5D: Euro QoL; Pao2: partial pressure of oxygen in arterial blood; PaCO2: arterial partial pressure of carbon dioxide; FEV1%: forced expiratory volume in 1 second; FVC: forced vital capacity; DLCO: diffusion lung capacity for carbon monoxide; VA: alveolar volume; ACRBP: altered circadian rhythm of blood pressure.

Spearman's coefficients: \*asterisk indicates p value <0.05; \*\*indicates p value <0.01.
